# Supplementary material for: Ti(iii)-Catalyzed, concise synthesis of marine furanospongian diterpenes
Source: Royal Society of Chemistry journal article supplement (doi:10.1039/c2ra22281g), 2012-01-01

# **Ti(III)-Catalyzed, Concise Synthesis of Marine Furanospongian Diterpenes.**

Antonio Rosales,<sup>\*</sup> Juan Muñoz-Bascón, Víctor Manuel Morales-Alcazar, José Antonio Castilla-Alcalá, Ignacio Rodríguez-García, and J. Enrique Oltra<sup>\*</sup>

Department of Organic Chemistry, Faculty of Sciences, University of Granada, 18071 Granada, Spain and Department of Clinic Analysis, University Hospital “Virgen de las Nieves”, 18014 Granada, Spain

## **Supplementary Material**

### **Table of contents**

NMR-spectra

S2

## NMR SPECTRA

$^1\text{H}$  and  $^{13}\text{C}$  spectra of compound **8**

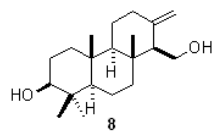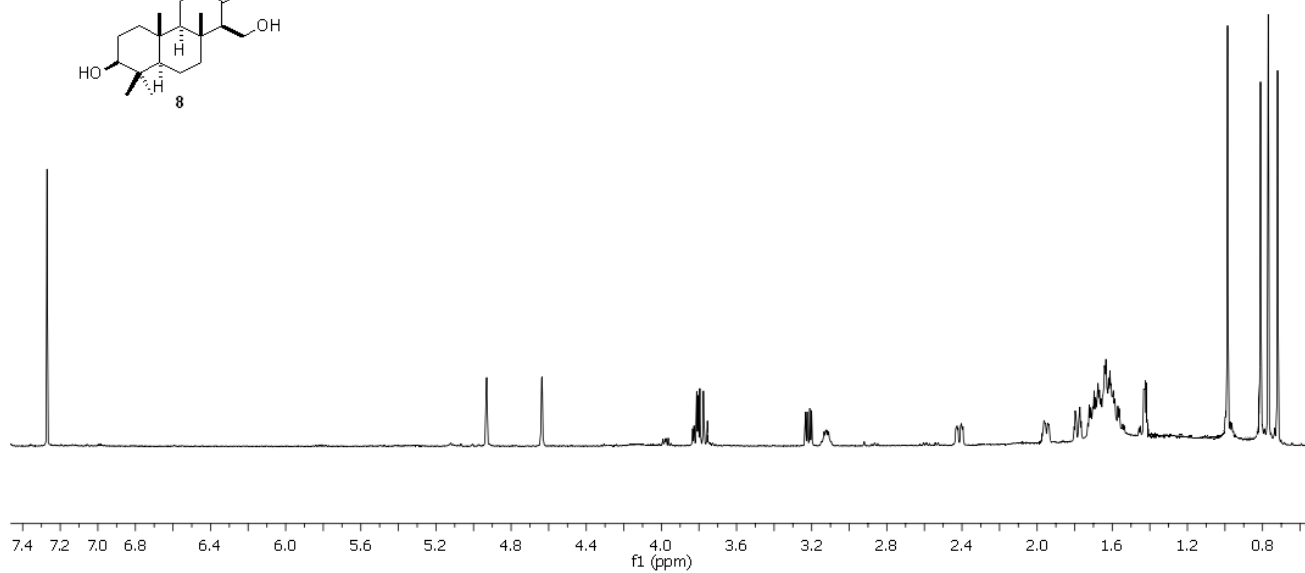

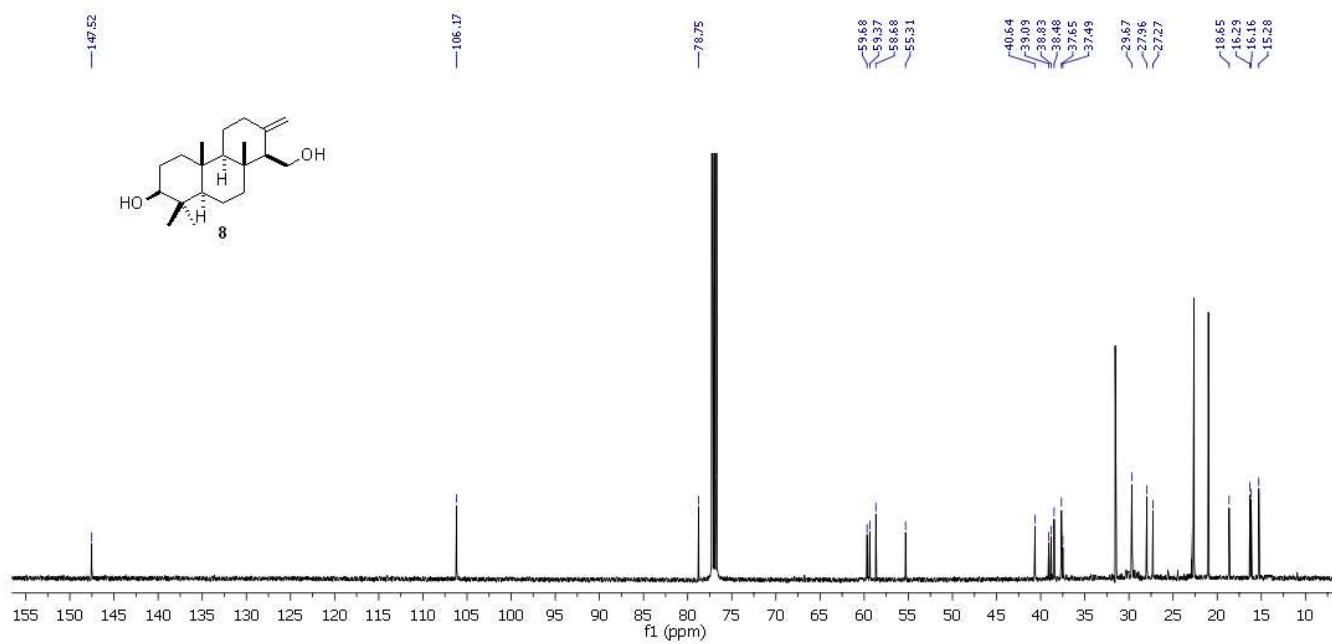

# $^1\text{H}$ and $^{13}\text{C}$ spectra of compound **9**

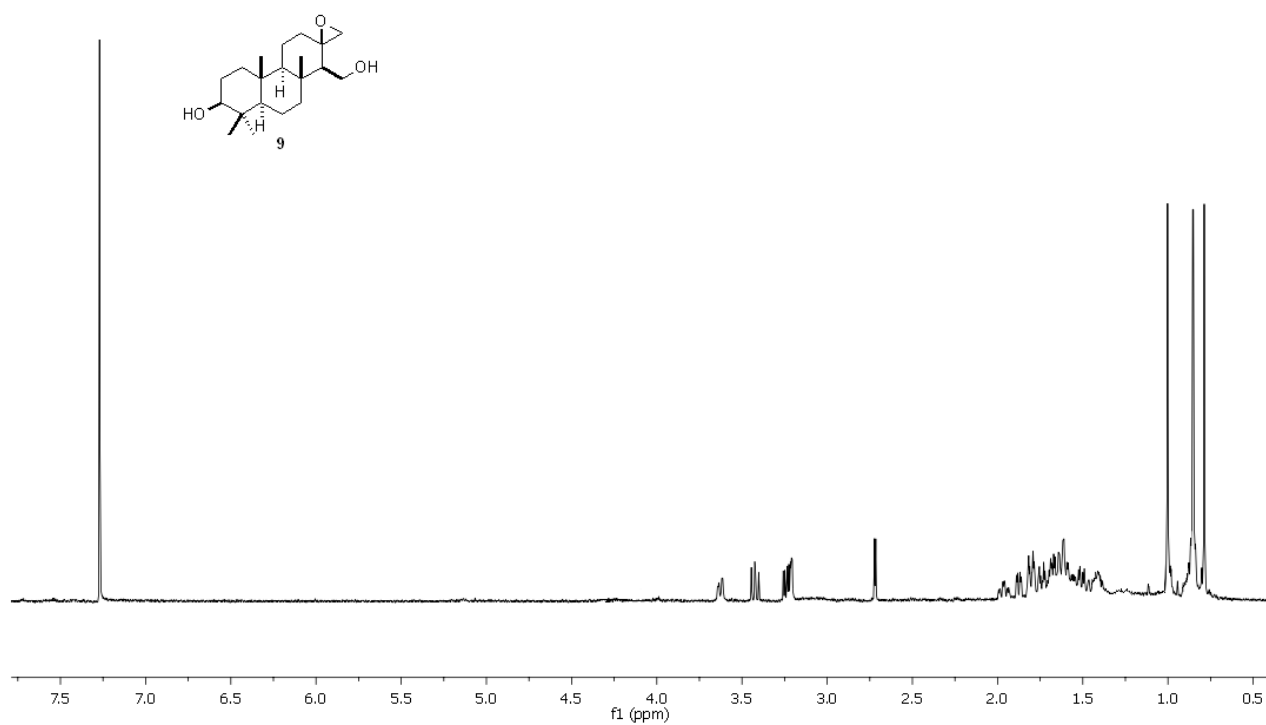

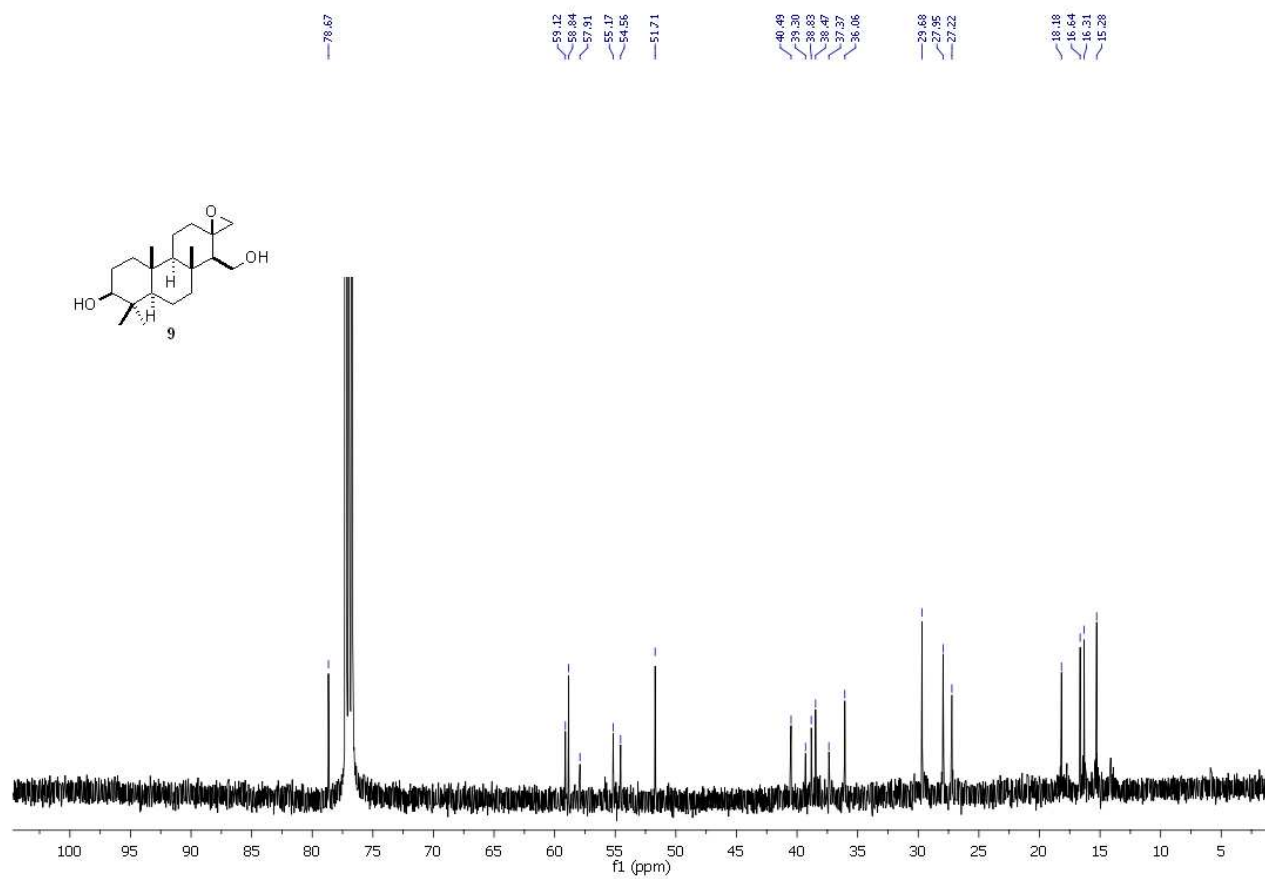

# $^1\text{H}$ and $^{13}\text{C}$ spectra of compound **10**

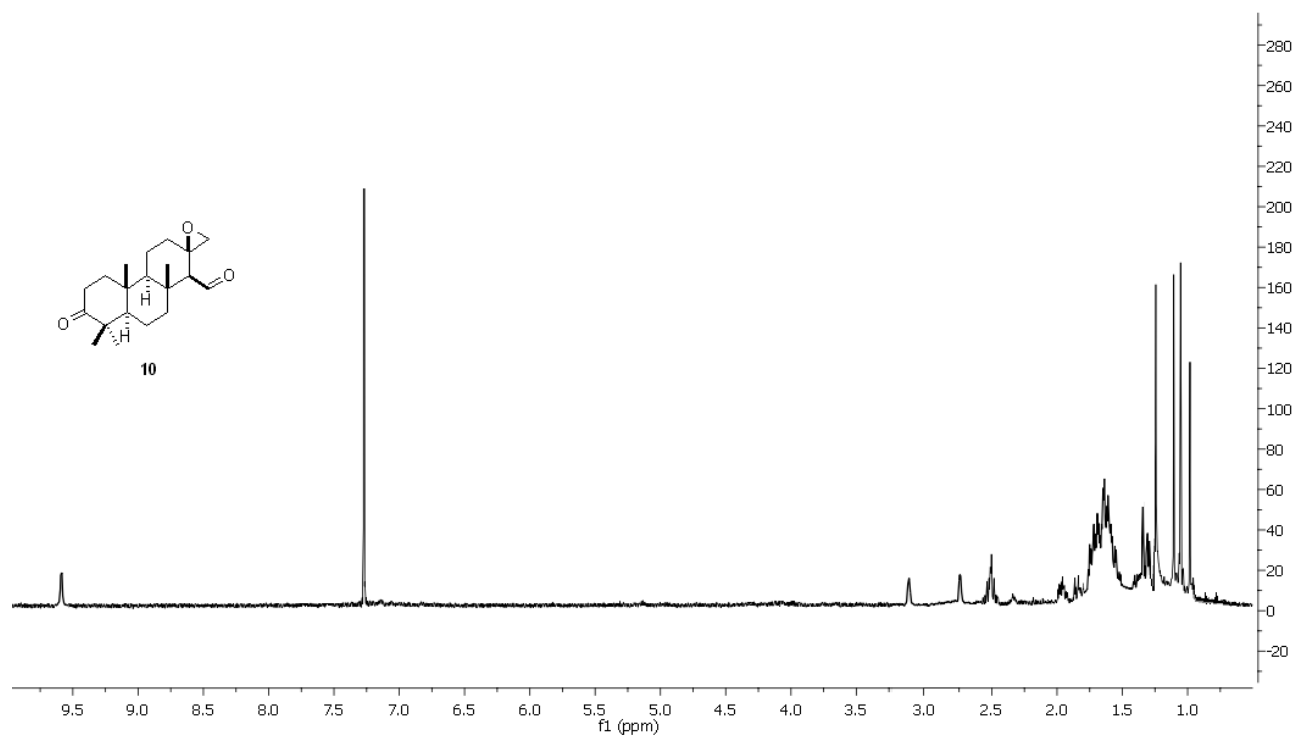

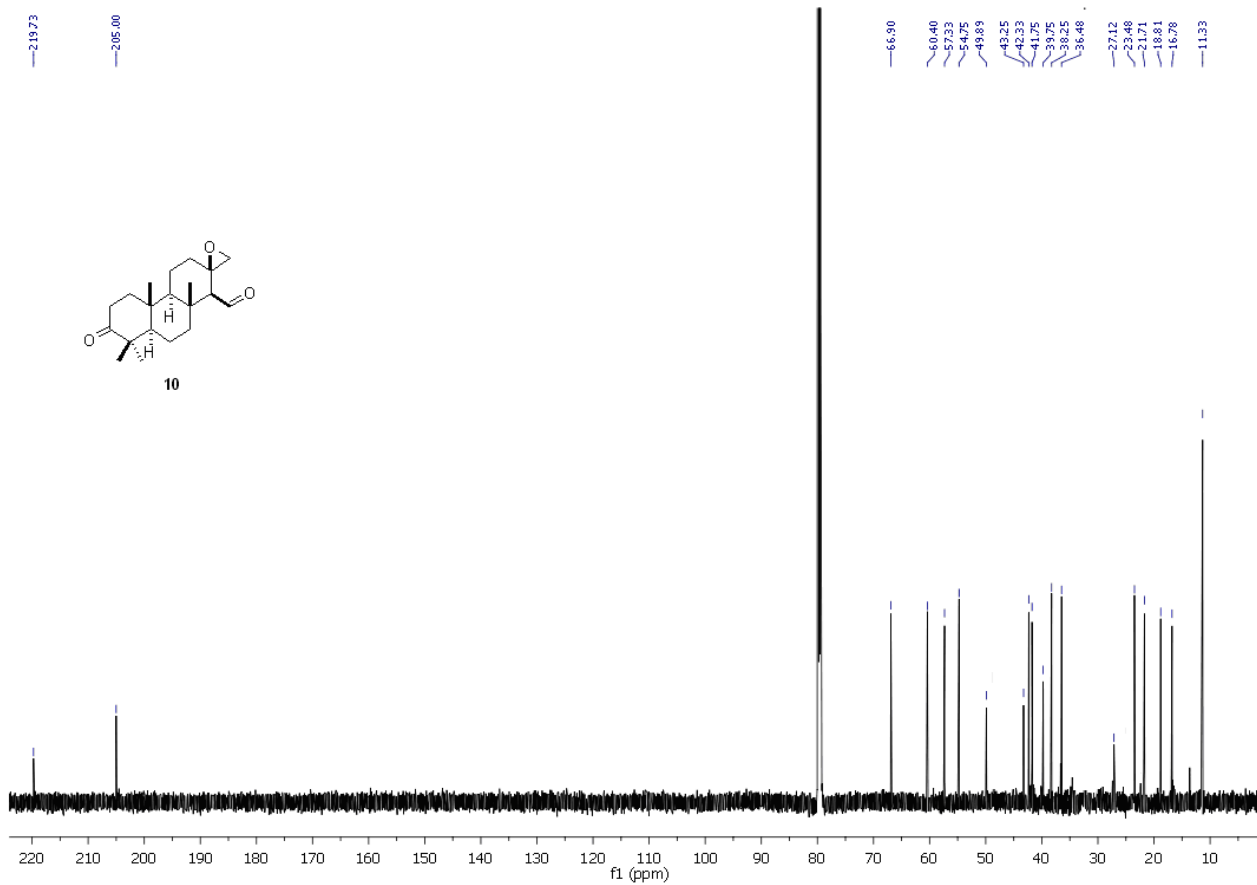

$^1\text{H}$  spectra of compound **2**

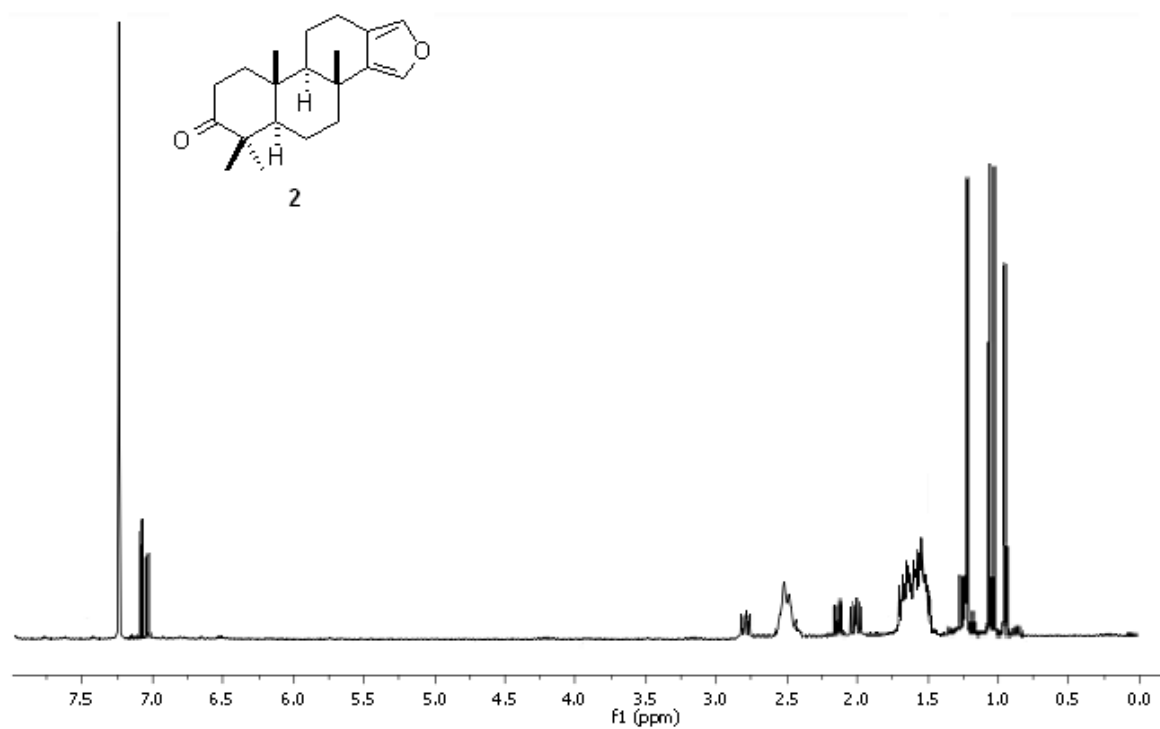

Supplement: c2ra22281g.pdf [file c2ra22281g.pdf]
